# Supplementary material for: Elastic constants of hard thick platelets by Monte Carlo simulation and virial expansion
Source: Royal Society of Chemistry journal article supplement (doi:10.1039/c0sm00541j), 2010-10-21
Supplement: c0sm00541j.pdf [file c0sm00541j.pdf]

# Elastic constants of hard thick platelets by Monte Carlo simulation and virial expansion: SUPPLEMENTARY DATA

Paul A. C. O'Brien and Michael P. Allen

*Department of Physics and Centre for Scientific Computing  
University of Warwick, Coventry, CV4 7AL, UK*

David L. Cheung

*Department of Chemistry and Centre for Scientific Computing  
University of Warwick, Coventry, CV4 7AL, UK*

Matthew Dennison\* and Andrew Masters

*School of Chemical Engineering and Analytical Science  
University of Manchester, Oxford Road, Manchester, M13 9PL, UK*

---

\*Current address: Soft Condensed Matter, Debye Institute for Nanomaterials Science, Utrecht University,  
Princetonplein 5, 3584 CC Utrecht, The Netherlands

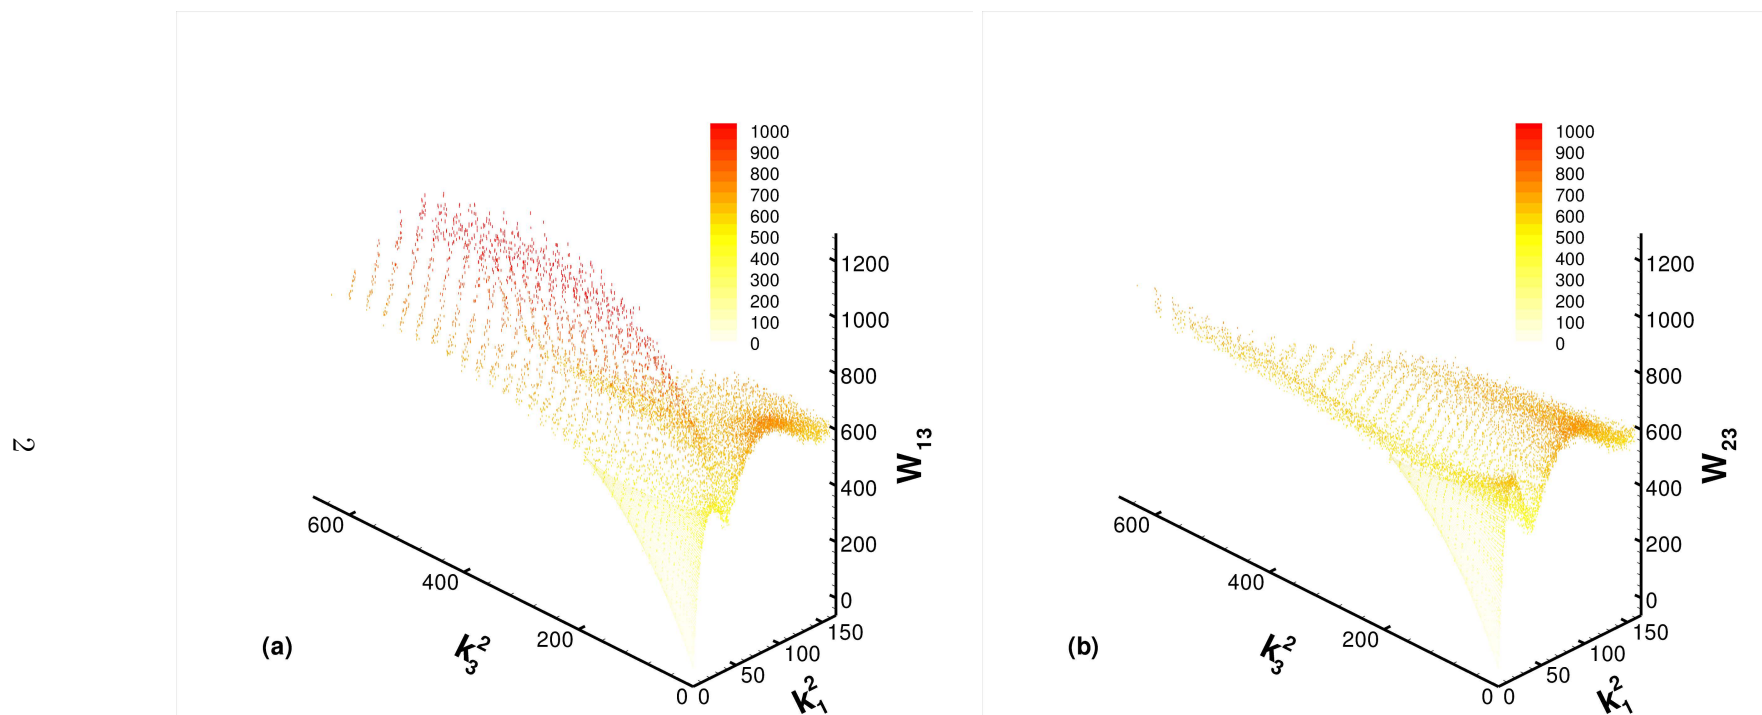

FIG. S1: The inverse fluctuation spectra (a)  $W_{13}$  and (b)  $W_{23}$  as a function of wavevector components  $(k_1^2, k_3^2)$  for cut spheres with  $H/D = 1/20$ ,  $\rho D^3 = 8.0$ . The simulation data with statistical error is given as a set of vertical lines, with the dotted surface representing the fitting function. The legends show the contour colour coding, with all units such that  $D = 1$  and  $k_B T = 1$ .

S

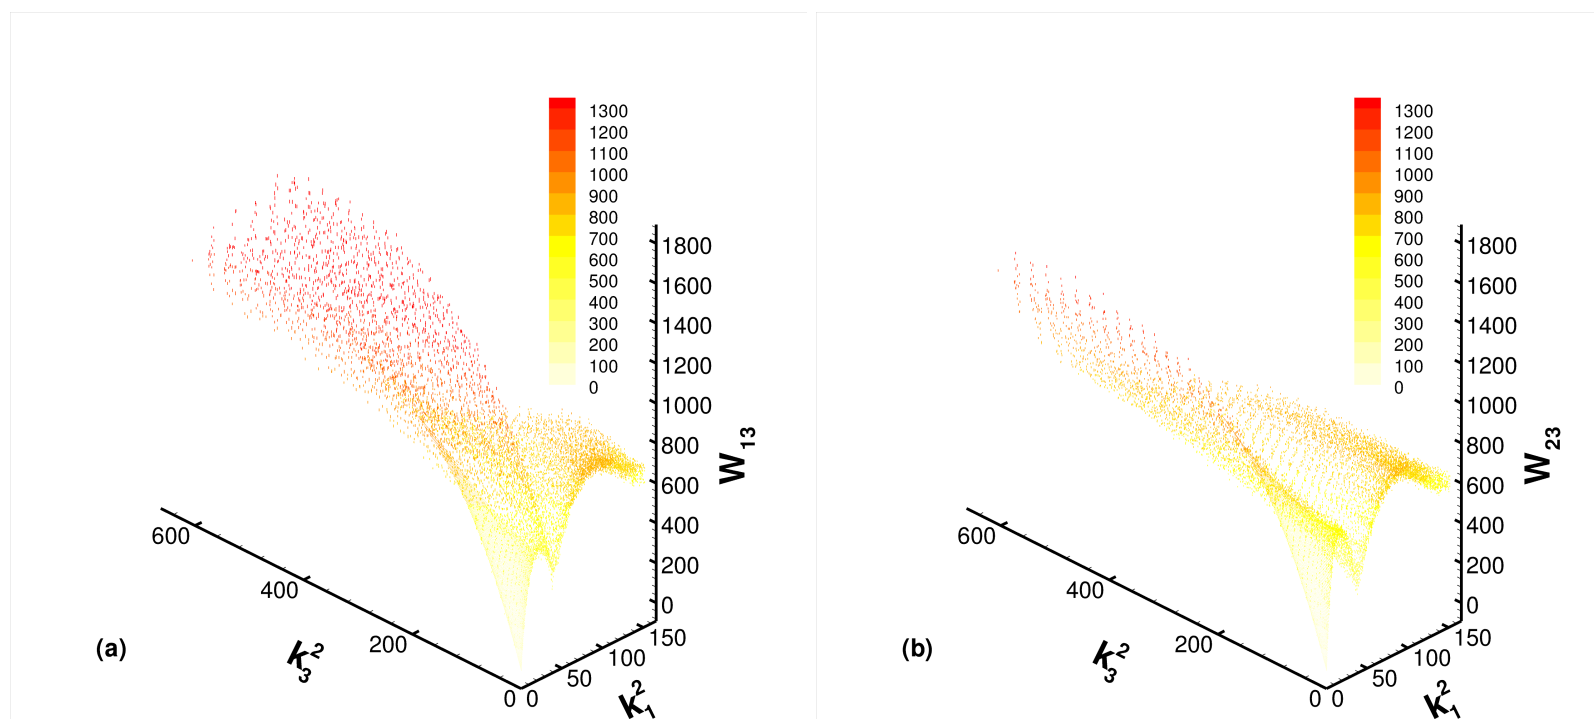

FIG. S2: The inverse fluctuation spectra (a)  $W_{13}$  and (b)  $W_{23}$  as a function of wavevector components ( $k_1^2, k_3^2$ ) for cut spheres with  $H/D = 1/15$ ,  $\rho D^3 = 7.5$ . Notation as for Figure S1.

4

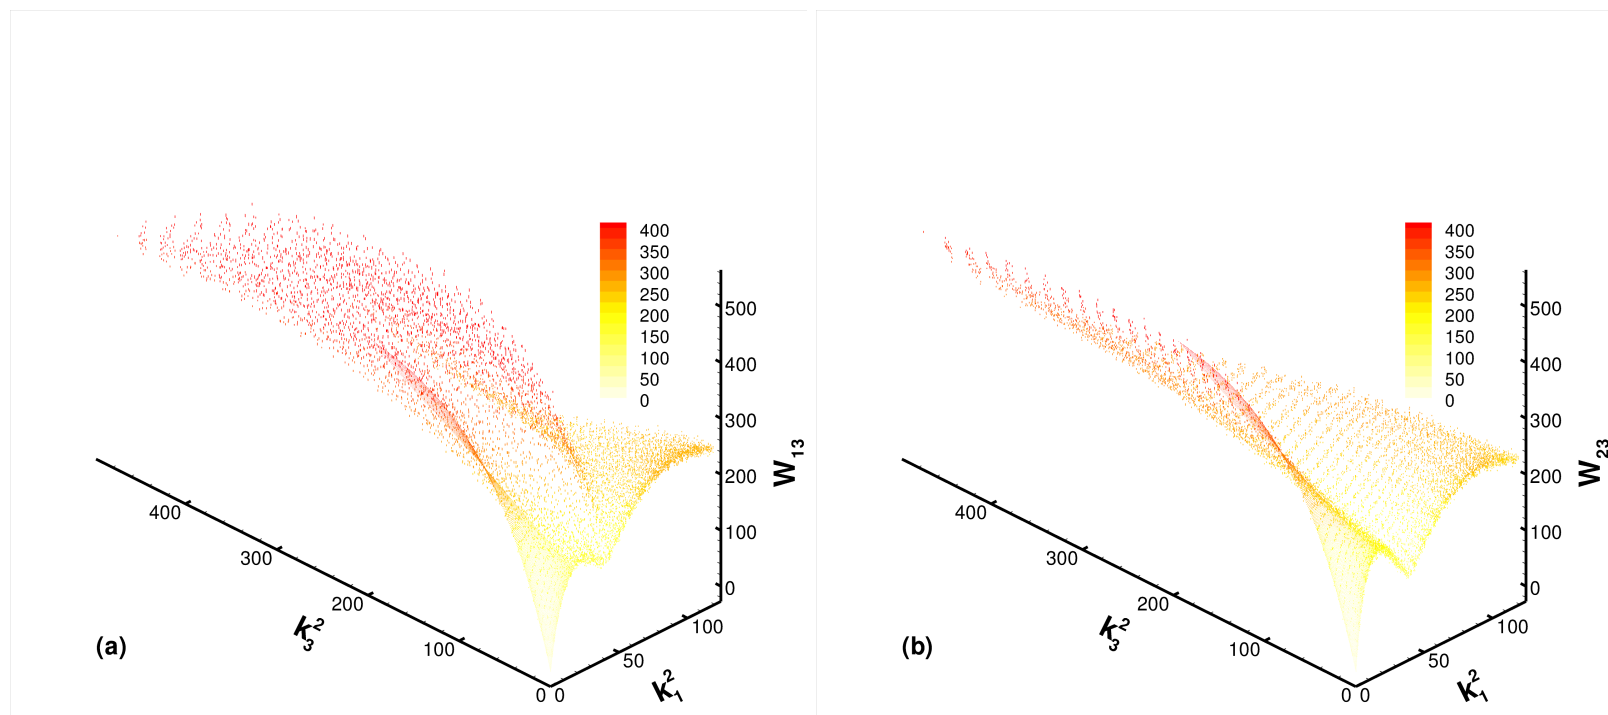

FIG. S3: The inverse fluctuation spectra (a)  $W_{13}$  and (b)  $W_{23}$  as a function of wavevector components  $(k_1^2, k_3^2)$  for cut spheres with  $H/D = 1/10$ ,  $\rho D^3 = 5.2$ . Notation as for Figure S1.
